# Supplementary material
Source: Research Square preprint supplement (doi:10.21203/rs.3.rs-9548364/v1)
Supplement: Supplementary file 1 [file fbb3c8511f16dd7767c8dde8.docx]

**Mechanistic Investigation of Borax Concentration on the Stability and Physicochemical Properties of Cold Cream Emulsions**

Uditi Handa1*, Anuj Malik2, Anil Kumar3

1Guru Gobind Singh College of Pharmacy, Yamuna Nagar, Haryana, India; 2M.M. College of Pharmacy, M.M. (DU), Mullana, Ambala, Haryana, India; 3Geeta Institute of Pharmacy, Geeta University, Naultha (Panipat).


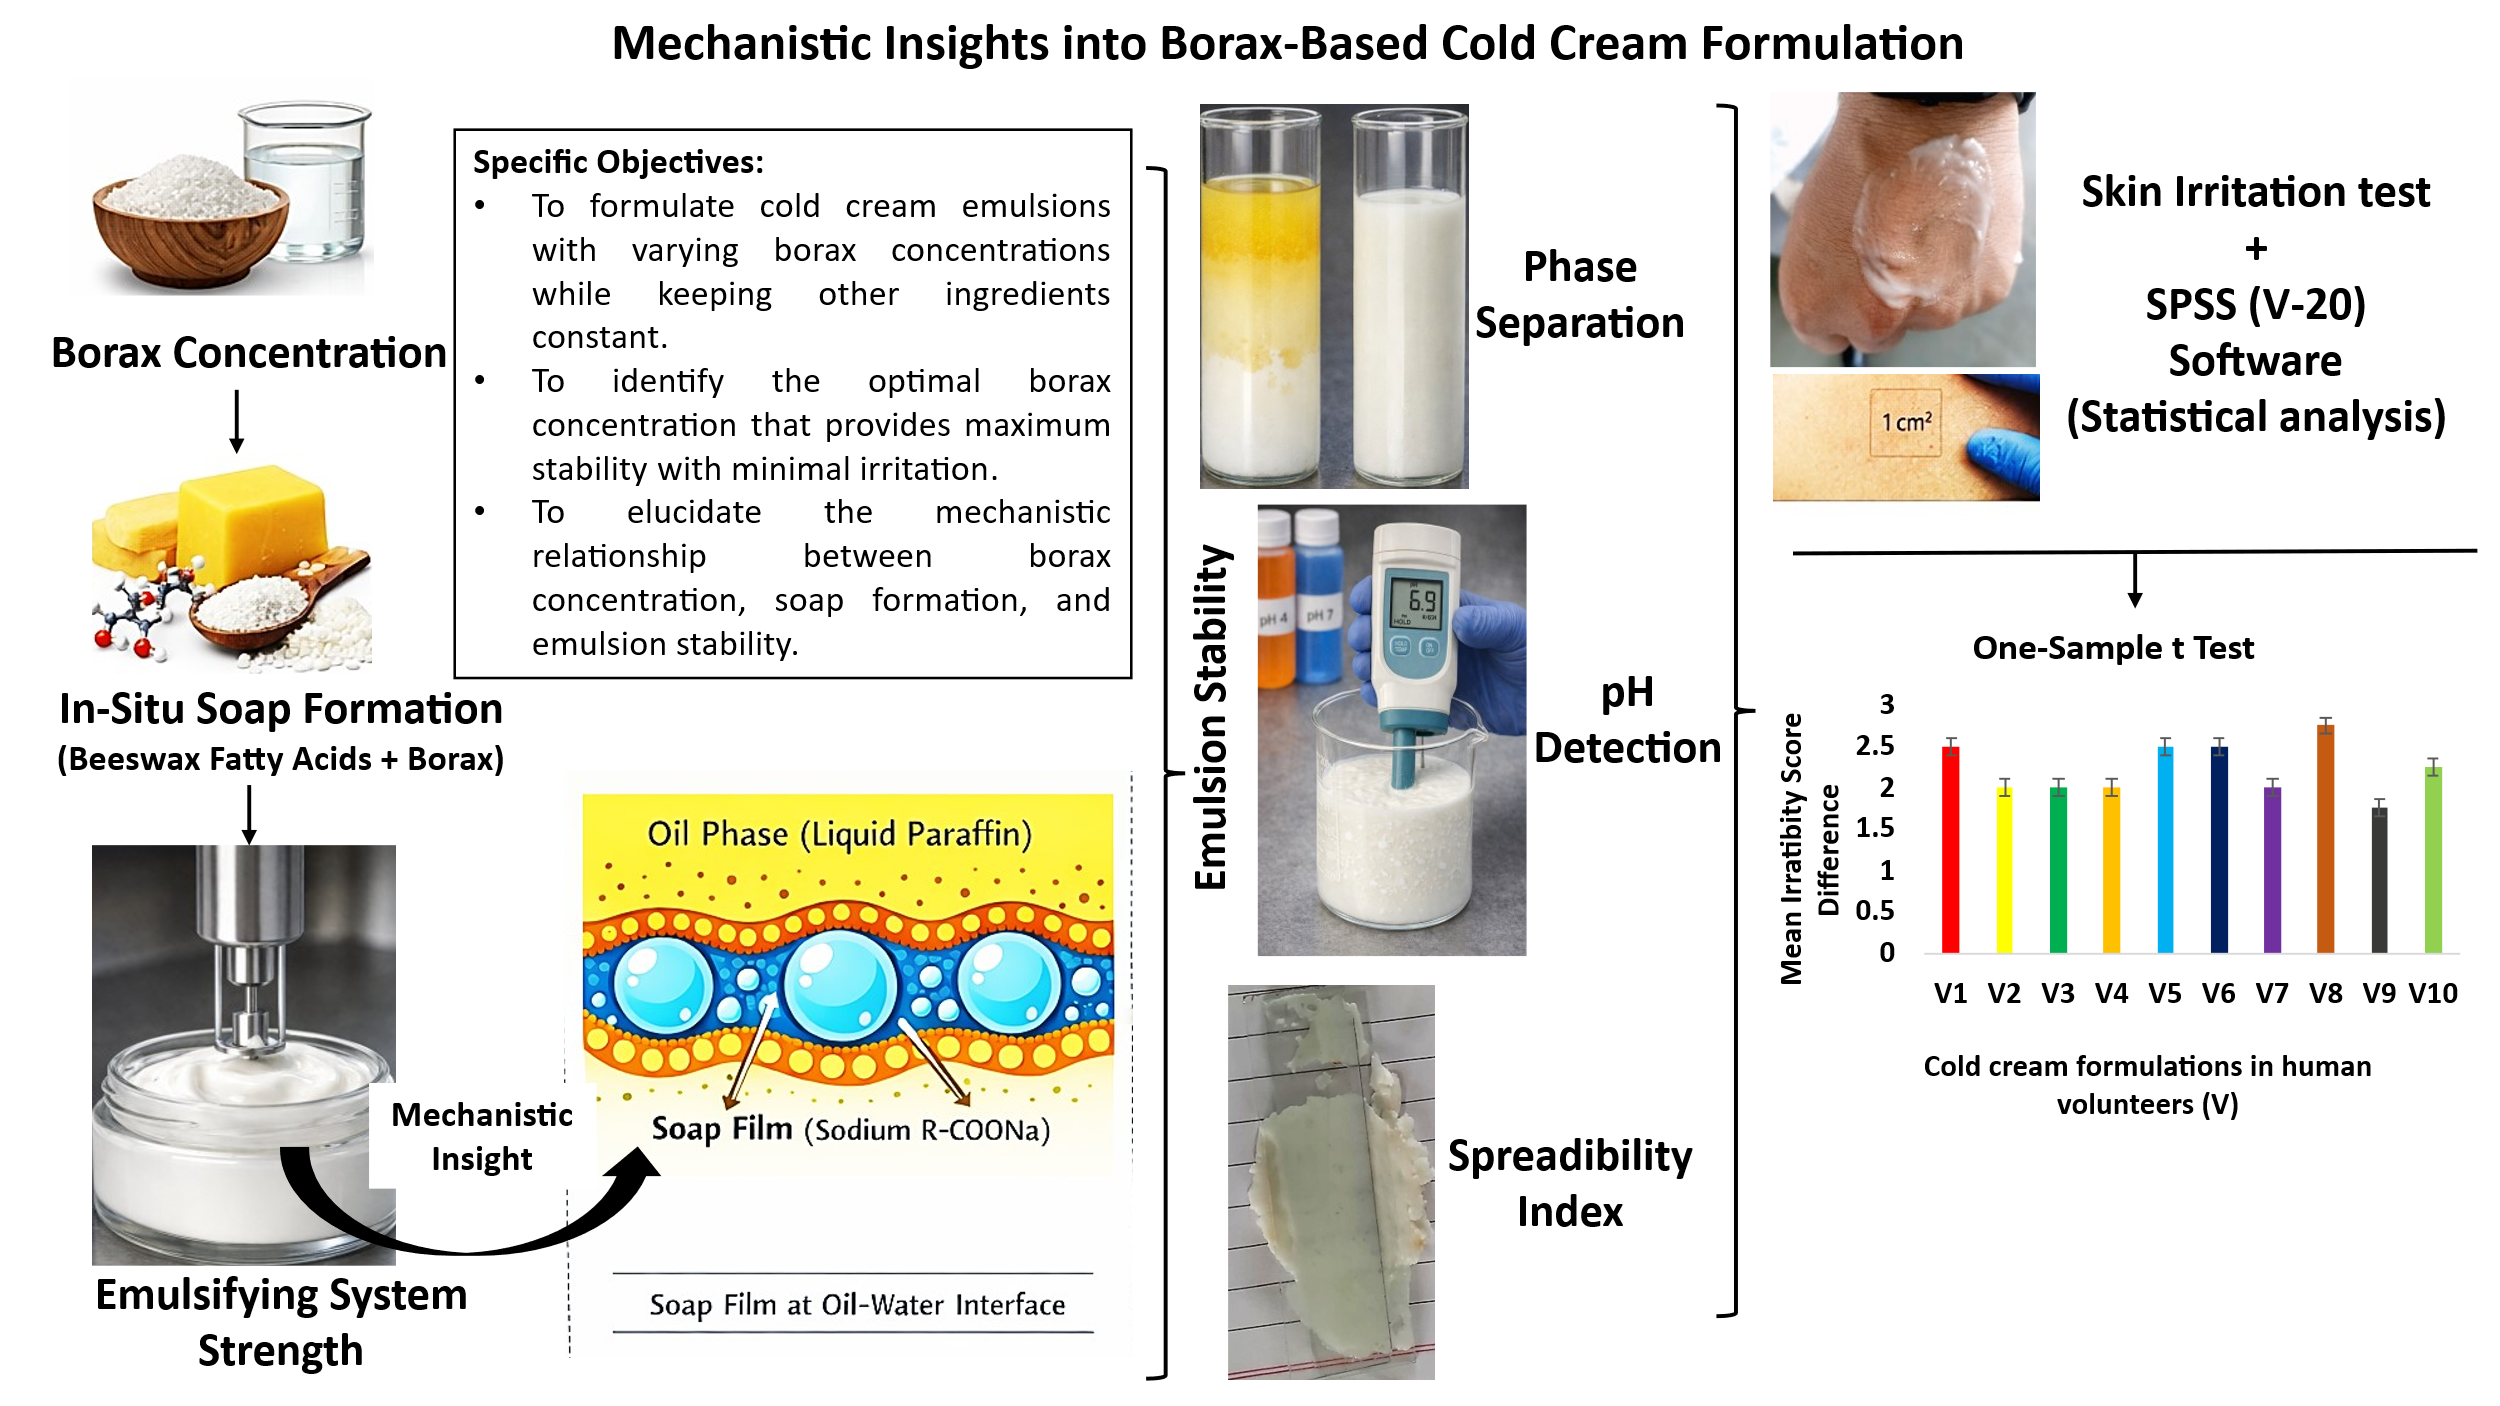


**Conclusion:** The study confirms borax concentration as a key factor governing cold cream stability and biocompatibility.
